# Supplementary material for: Clomiphene Citrate in the Management of Infertility in Oligospermic Obese Men with Hypogonadism: Retrospective Pilot Study
Source: MDPI journal article supplement (doi:10.3390/medicina59111902), 2023-10-26
Supplement: s1 [file s1]

**Table S1:** Pre- and post-treatment semen parameters and testosterone levels in oligozoospermic hypogonadal obese men treated with clomiphene citrate for male infertility

| Parameters                                      | Pre-Rx           | Post-Rx           | Difference        | p-value |
|-------------------------------------------------|------------------|-------------------|-------------------|---------|
|                                                 | Mean $\pm$ SD    | Mean $\pm$ SD     | Mean $\pm$ SD     |         |
| Sperm Concentration ( $\times 10^6/\text{mL}$ ) | 4.7 $\pm$ 9.8    | 11.4 $\pm$ 15.6   | 6.8 $\pm$ 10.3    | <0.05   |
| Total Sperm Count ( $\times 10^6$ )             | 20.7 $\pm$ 59.5  | 42.9 $\pm$ 63.4   | 22.1 $\pm$ 62.1   | 0.22    |
| Motility (%)                                    | 20.8 $\pm$ 17.3  | 41.5 $\pm$ 11.8   | 20.6 $\pm$ 22.8   | <0.05   |
| Normal Head Forms (%)                           | 11.3 $\pm$ 9.8   | 20.7 $\pm$ 9.3    | 9.4 $\pm$ 13.8    | <0.05   |
| Testosterone (ng/dL)                            | 193.8 $\pm$ 59.3 | 332.7 $\pm$ 114.8 | 138.8 $\pm$ 127.8 | <0.05   |

*Note: p-value <0.05 is considered statistically significant*
